# Supplementary material for: A multiscale approach for bridging the gap between potency, efficacy, and safety of small molecules directed at membrane proteins
Source: PubMed Central journal article supplement (PMC8368179; doi:10.1038/s41598-021-96217-7), 2021-08-16
Supplement: 41598_2021_96217_MOESM1_ESM.pdf [file 41598_2021_96217_MOESM1_ESM.pdf]

## Supplementary Information for

### A multiscale approach for bridging the gap between potency, efficacy, and safety of small molecules directed at membrane proteins

Rodrigo Aguayo-Ortiz,<sup>a,d,1</sup> Jeffery Creech,<sup>a,b,1</sup> Eric N. Jiménez-Vázquez,<sup>a</sup> Guadalupe Guerrero-Serna,<sup>a</sup> Nulang Wang,<sup>a</sup> Andre Monteiro da Rocha,<sup>a,b</sup> Todd J. Herron,<sup>a,b,c</sup> and L. Michel Espinoza-Fonseca<sup>a,\*</sup>

<sup>a</sup>Center for Arrhythmia Research, Department of Internal Medicine, Division of Cardiovascular Medicine, University of Michigan, Ann Arbor, MI 48109, USA.

<sup>b</sup>Frankel Cardiovascular Regeneration Core Laboratory, University of Michigan, Ann Arbor, MI 48109, USA.

<sup>c</sup>CARTOX, Inc., 56655 Grand River Ave., PO Box 304, New Hudson, MI 48165, USA.

<sup>d</sup>Departamento de Farmacia, Facultad de Química, Universidad Nacional Autónoma de México, Mexico City 04510, Mexico

\*To whom correspondence should be addressed; Email: [lmef@umich.edu](mailto:lmef@umich.edu)

<sup>1</sup>R. A.-O. and J.C. contributed equally to this work.

#### This PDF file includes:

Supplementary Methods  
Figures S1 and S2  
Table S1

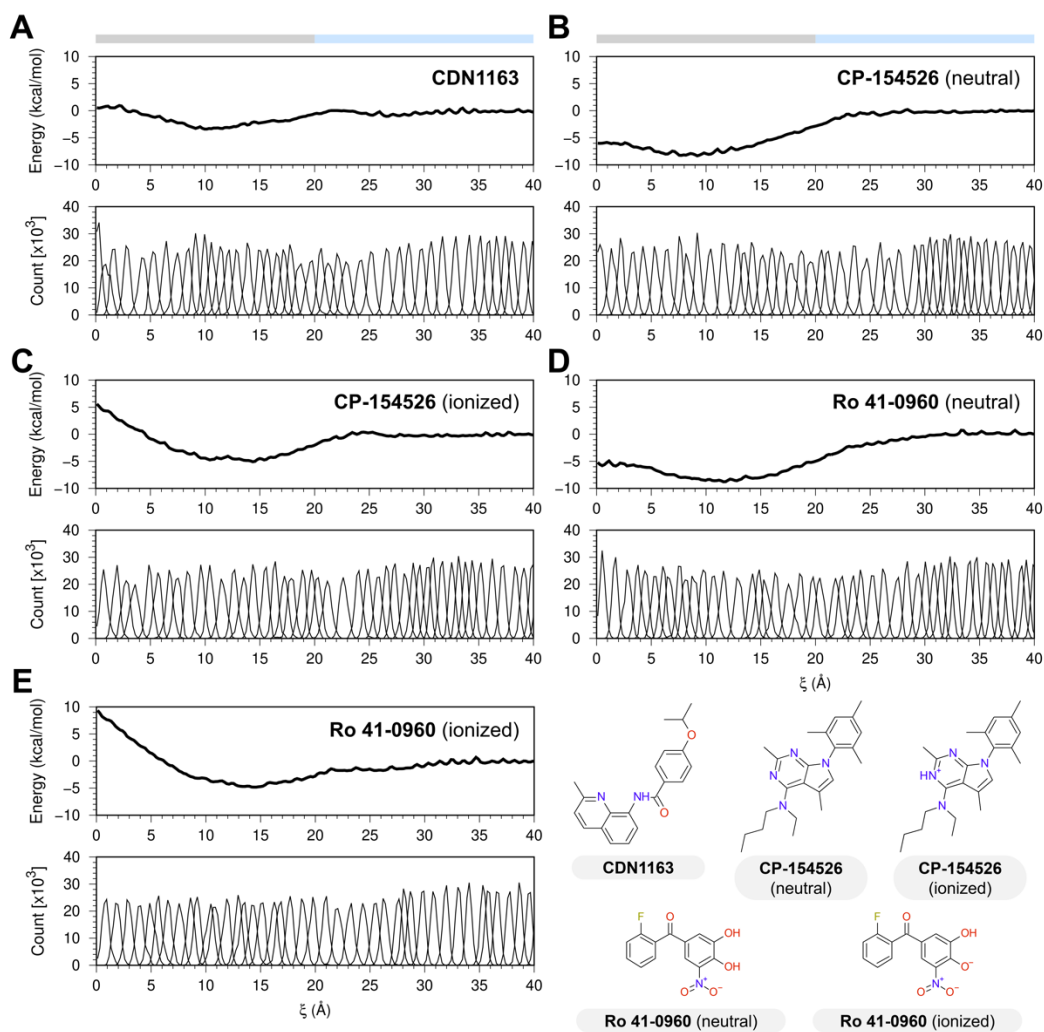

**Fig. S1. Umbrella sampling analysis.** Potential of mean force (PMF) profile (top) and histograms (bottom) of (A) CDN1163, (B, C) CP-154526, and (D, E) Ro 41-0960 through the POPC lipid bilayer along the reaction coordinate ( $\xi$ ). The lower right section shows the chemical structures of the compounds and the protonation states used during the study.

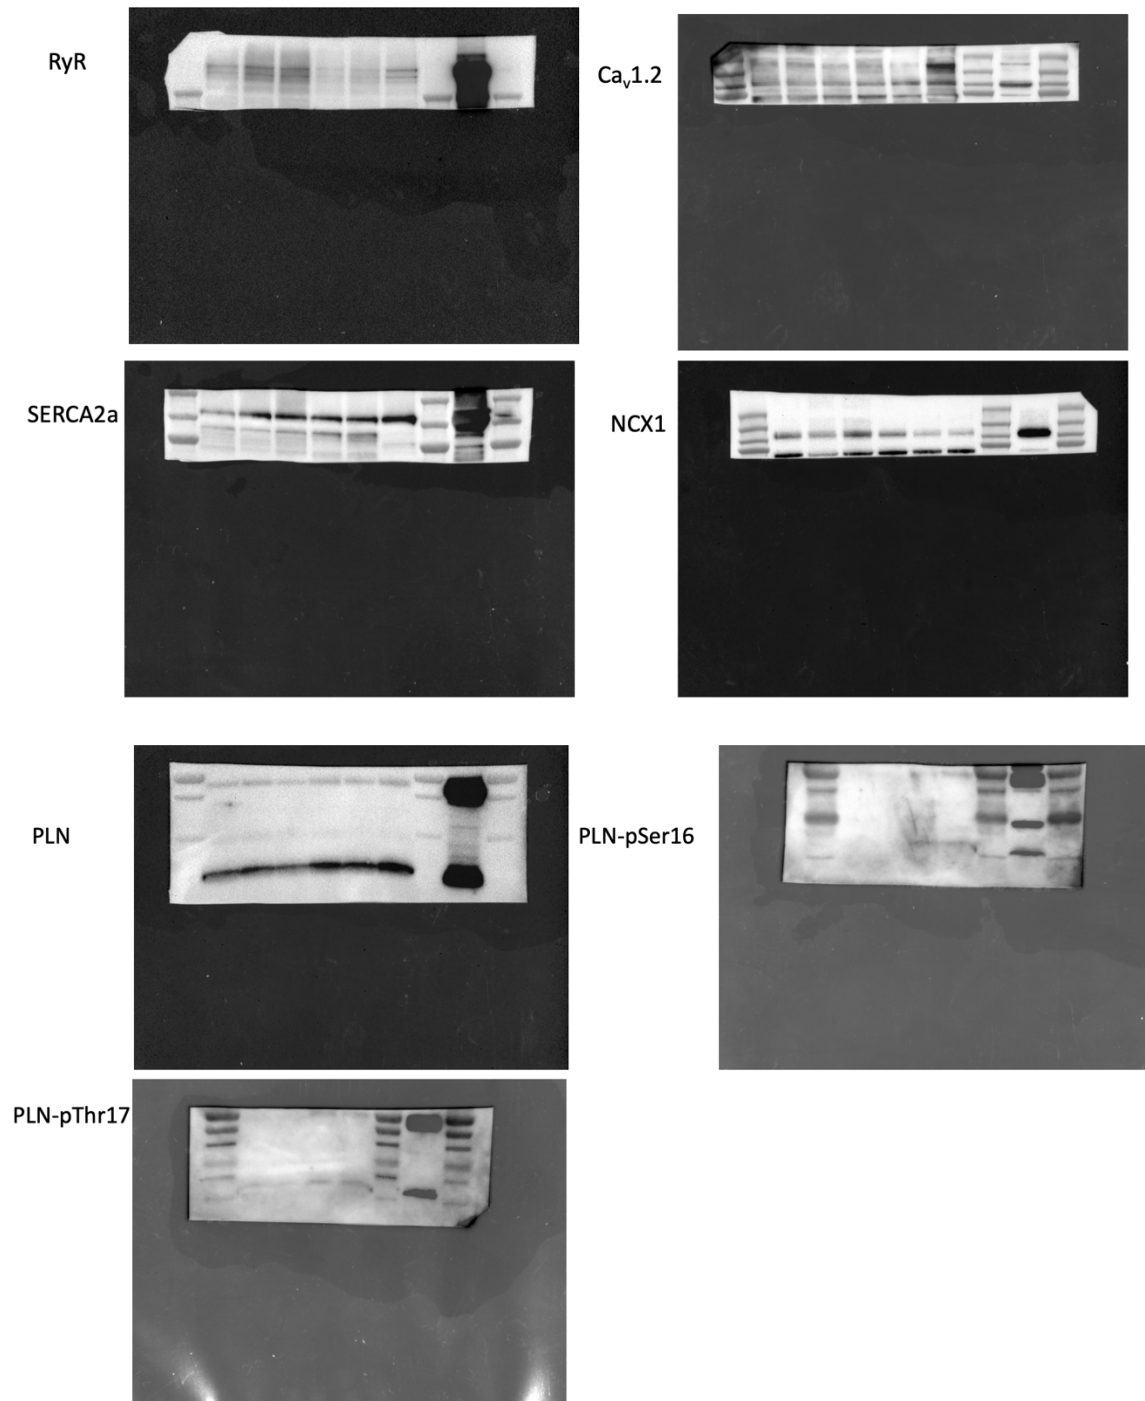

**Fig. S2.** Original images (tiff format) exported from the Image Lab software (Bio-Rad) obtained by the scanning of blots. For the final Figure 5 in the main text, we crop the black/grey area of each image and adjust the size in a way that all blots have the same length. In some cases, the levels were adjusted so that the bands become more apparent; the whole horizontal lines of bands were adjusted at the same time.

Table S1. Antibodies used to detect and quantify expression of Ca<sup>2+</sup>-handling proteins in iPSC-derived cardiac cells

| <b>Primary antibodies</b>         | <b>Vendor/Supplier</b> | <b>Catalog #</b> | <b>Dilution</b>            |
|-----------------------------------|------------------------|------------------|----------------------------|
| GAPDH                             | Sigma                  | G-8785           | 1:2000                     |
| Serca2a                           | ThermoFisher           | MA3-919          | 1:500                      |
| Phospholamban                     | Badrilla               | A010-14          | 1:5000                     |
| Phospho-phospholamban (PLN-Ser16) | Badrilla               | A010-12AP        | 1:2500                     |
| Phospho-phospholamban (PLN-Thr17) | Badrilla               | A010-13AP        | 1:1000                     |
| Ryanodine Receptor (all RYR)      | ThermoFisher           | MA3-925          | 1:500                      |
| Cav1.2                            | Alomone                | ACC-003          | 1:250                      |
| NCX1                              | Swant                  | R3F1             | 1:500                      |
| <b>Secondary antibodies</b>       |                        |                  |                            |
| Goat anti-mouse-HRP               | Jackson ImmunoResearch | 115-035-166      | 1:1000<br>1:5000 for GAPDH |
| Goat anti-rabbit-HRP              | Jackson ImmunoResearch | 111-035-144      | 1:1000                     |
